# Supplementary material for: The mTORC2 Regulator homer1 Modulates Protein Levels and Sub-Cellular Localization of the CaSR in Human Osteoblasts.
Source: Preprints.org preprint supplement (doi:10.20944/preprints202101.0232.v1), 2021-01-12
Supplement: Supplementary file 1 [file supplementary]

**SUPPLEMENTAL FIGURE LEGENDS**

**Figure Supp 1-** **Multiple Homer isoforms are expressed in primary human osteoblasts.** Primary human osteoblasts from three independent donors (d1-d3) were cultured in 10% DMEM for 48 h and lysed. Equal amounts of total cell protein were then analysed by western blot for Homer1a, Homer1, Homer2, Homer-3 or -tubulin(loading control).

**Figure Supp 2- Decreased Homer2 protein levels were associated with overexpressed levels of Homer1 protein in the long bones of CaSR(-/-) mice.** Western blot for Homer1, Homer2 or -actin (loading control) of protein extracted from the long bones of wild type (+/+), heterozygous (+/-) or CaSR deficient (-/-) mice.

**Fig Supp 1**

**
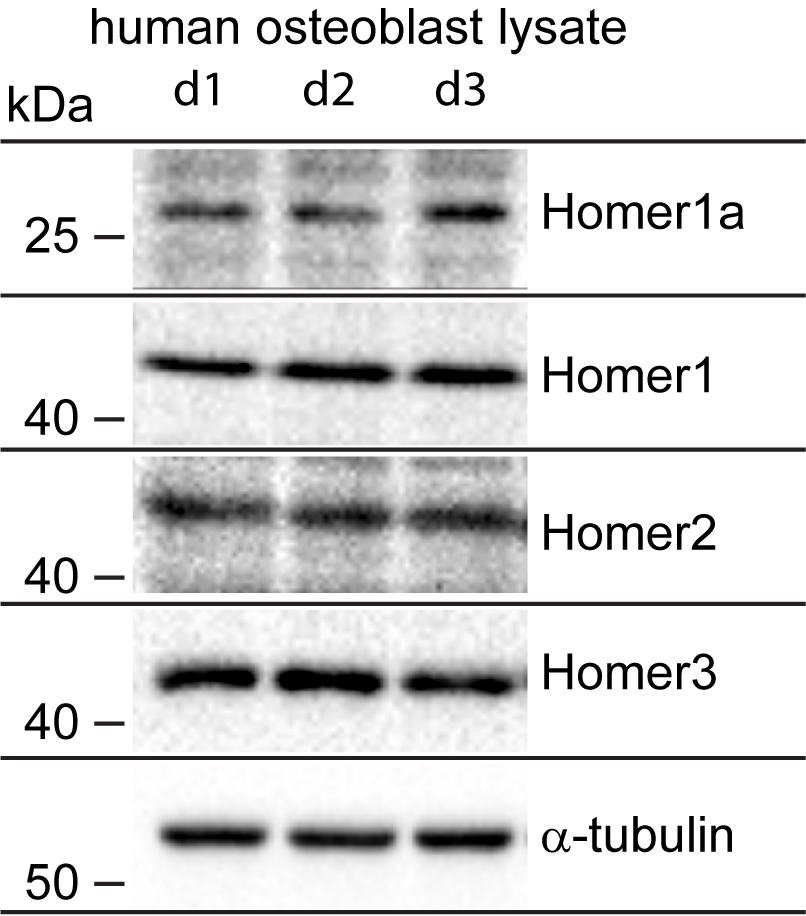
**

**Fig Supp 2**

**
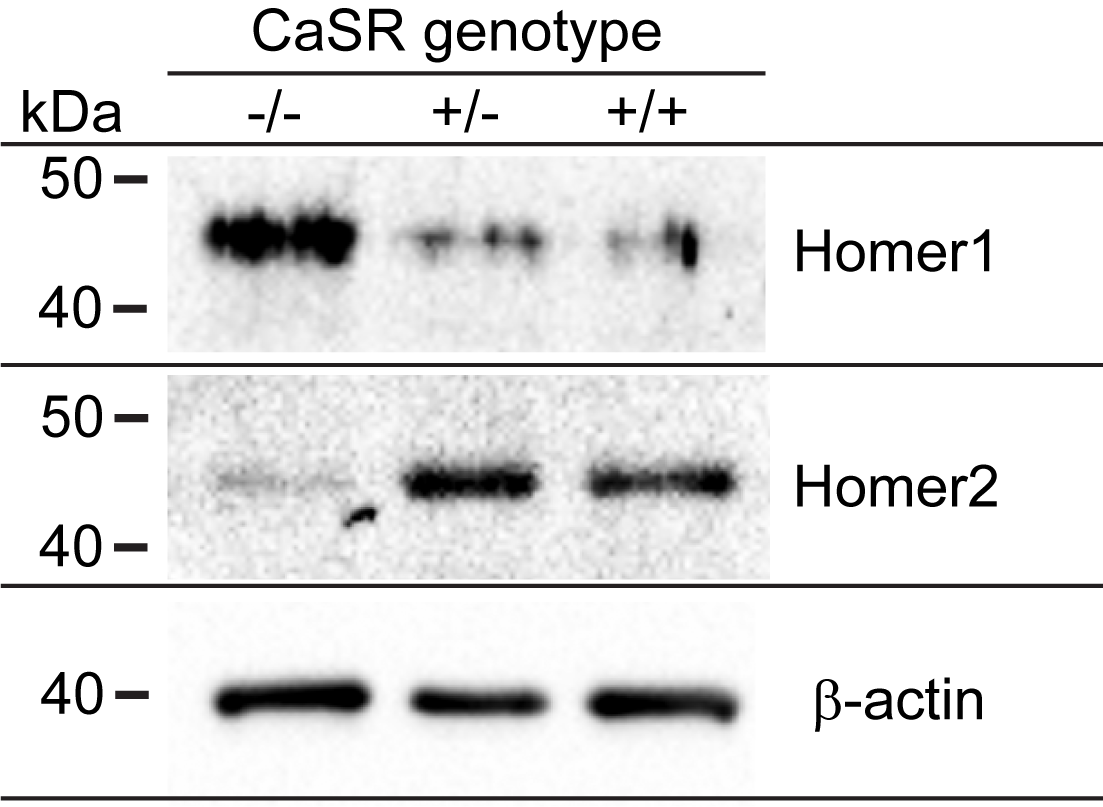
**
